# Supplementary material for: Epidemiological Studies of Pan-Azole Resistant Aspergillus fumigatus Populations Sampled during Tulip Cultivation Show Clonal Expansion with Acquisition of Multi-Fungicide Resistance as Potential Driver
Source: MDPI journal article supplement (doi:10.3390/microorganisms9112379), 2021-11-18
Supplement: s1 [file s1]

**Table S1.** Isolates characterised using STRAf typing and sequence analysis of genes encoding CSP and CYP51A. Product sizes (bp) are presented for STRAf markers 2A, 2B, 2C, 3A, 3B, 3C, 4A, 4B and 4C.

| Isolate <sup>1</sup> | Origin    | Location    | Year  | CYP51A variant                                  | 2A  | 2B  | 2C  | 3A  | 3B  | 3C  | 4A  | 4B  | 4C  | CSP type |
|----------------------|-----------|-------------|-------|-------------------------------------------------|-----|-----|-----|-----|-----|-----|-----|-----|-----|----------|
| Air teb1             | Air       | Netherlands | 2018  | TR <sub>34</sub> /L98H/T289A/G448S              | 188 | 123 | 158 | 136 | 163 | 82  | 180 | 185 | 226 | t02?     |
| HPPb-1*              | Air       | UK          | 2018  | TR <sub>34</sub> /L98H                          | 192 | 143 | 175 | 202 | 160 | 94  | 188 | 201 | 166 | t02      |
| BTta-1*              | Air       | Netherlands | 2018  | TR <sub>46</sub> /Y121F/M172I/T289A/G448S       | 194 | 146 | 164 | 187 | 163 | 82  | 200 | 181 | 226 | t01      |
| Air carb5            | Air       | Netherlands | 2018  | wt                                              | 194 | 143 | 164 | 202 | 160 | 85  | 180 | 185 | 266 | t02      |
| BKCb-1*              | Air       | Netherlands | 2018  | TR <sub>46</sub> /Y121F/T289A/S363P/I364V/G448S | 194 | 143 | 164 | 238 | 166 | 97  | 196 | 181 | 182 | t01      |
| V094-26              | Patient   | Netherlands | 2010  | TR <sub>46</sub> /Y121F/T289A                   | 163 | 143 | 164 | 214 | 160 | 94  | 196 | 181 | 182 | t01      |
| CXH_07               | Patient   | UK          |       | TR <sub>34</sub> /L98H                          | 171 | 149 | 171 | 187 | 169 | 91  | 180 | 209 | 246 | t04A     |
| ASP251               | Patient   | Germany     |       | TR <sub>34</sub> /L98H/S297T/F495I              | 171 | 123 | 158 | 199 | 160 | 82  | 180 | 185 | 226 | t02      |
| OKH50                | Patient   | Japan       |       | TR <sub>34</sub> /L98H                          | 171 | 146 | 156 | 202 | 160 | 82  | 180 | 185 | 226 | t02      |
| ARAF017              | Patient   | Netherlands |       | TR <sub>34</sub> /L98H                          | 171 | 143 | 173 | 202 | 166 | 94  | 180 | 201 | 226 | t04A     |
| ARAF013              | Patient   | Netherlands |       | TR <sub>34</sub> /L98H/S297T/F495I              | 171 | 143 | 156 | 229 | 160 | 97  | 180 | 185 | 226 | t11      |
| D007                 | Patient   | Taiwan      |       | TR <sub>34</sub> /L98H/S297T/F495I              | 181 | 135 | 164 | 196 | 240 | 94  | 180 | 185 | 166 | t04A     |
| CYP_15_38            | Patient   | Belgium     |       | TR <sub>46</sub> /Y121F/T289A                   | 182 | 146 | 173 | 232 | 160 | 94  | 180 | 185 | 182 | t09      |
| ASP267               | Patient   | Germany     |       | TR <sub>34</sub> /L98H                          | 182 | 123 | 164 | 247 | 163 | 91  | 180 | 173 | 190 | t11      |
| CXH_06               | Patient   | UK          |       | TR <sub>34</sub> /L98H                          | 182 | 123 | 164 | 284 | 163 | 97  | 180 | 181 | 190 | t04B     |
| CYP_15_63            | Patient   | Belgium     |       | TR <sub>34</sub> /L98H/S297T/F495I              | 188 | 123 | 158 | 223 | 172 | 94  | 196 | 185 | 186 | t01      |
| ASP168               | Patient   | Germany     |       | TR <sub>34</sub> /L98H                          | 188 | 146 | 171 | 376 | 169 | 85  | 215 | 181 | 186 | t04B     |
| CYP_15_46            | Patient   | Belgium     |       | TR <sub>34</sub> /L98H                          | 192 | 143 | 156 | 208 | 160 | 94  | 180 | 185 | 166 | t02      |
| ASP164               | Patient   | Germany     |       | TR <sub>34</sub> /L98H                          | 192 | 125 | 164 | 382 | 160 | 88  | 180 | 185 | 178 | t11      |
| CYP_15_2             | Patient   | Belgium     |       | TR <sub>46</sub> /Y121F/T289A                   | 194 | 143 | 164 | 205 | 160 | 97  | 196 | 181 | 226 | t01      |
| CYP_15_7             | Patient   | Belgium     |       | TR <sub>46</sub> /Y121F/T289A                   | 194 | 146 | 158 | 208 | 166 | 130 | 180 | 201 | 186 | t01      |
| V093-54              | Patient   | Netherlands | 2009  | TR <sub>46</sub> /Y121F/T289A                   | 194 | 146 | 158 | 208 | 166 | 130 | 180 | 201 | 186 | t01      |
| CYP_15_80            | Patient   | Belgium     |       | TR <sub>46</sub> /Y121F/T289A                   | 194 | 143 | 156 | 235 | 160 | 82  | 180 | 185 | 226 | t02      |
| AF65*                | Reference | UK          | 1997  | wt                                              | 171 | 143 | 164 | 214 | 160 | 94  | 180 | 185 | 230 | t02      |
| WT-NL*               | Reference | Netherlands | <2014 | wt                                              | 188 | 141 | 169 | 262 | 166 | 85  | 200 | 181 | 166 | t01      |
| 08-19-02-10*         | Reference | Netherlands | 2008  | TR <sub>34</sub> /L98H                          | 192 | 152 | 164 | 364 | 160 | 91  | 180 | 185 | 190 | t04B     |

|             |           |             |       |                               |     |     |     |     |     |     |     |     |     |      |
|-------------|-----------|-------------|-------|-------------------------------|-----|-----|-----|-----|-----|-----|-----|-----|-----|------|
| TR34-NL*    | Reference | Netherlands | <2014 | TR <sub>34</sub> /L98H        | 192 | 152 | 164 | 364 | 160 | 91  | 180 | 185 | 190 |      |
| TR46-NL*    | Reference | Netherlands | <2014 | TR <sub>46</sub> /Y121F/T289A | 194 | 146 | 164 | 187 | 160 | 124 | 203 | 181 | 182 |      |
| AF293*      | Reference | UK          | 1993  | F46Y/M172V/N248T/D255E/E427K  | 194 | 139 | 175 | 247 | 195 | 133 | 192 | 185 | 178 | t06A |
| F2-B4       | Soil      | France      | 2016  | F46Y/M172V/E427K              | 163 | 131 | 160 | 160 | 166 | 109 | 176 | 165 | 166 | t07  |
| UK5-A9      | Soil      | UK          | 2016  | F46Y/M172V/E427K              | 163 | 137 | 160 | 178 | 172 | 127 | 176 | 165 | 170 | t08  |
| BB1-2.2-A4  | Soil      | UK          | 2015  |                               | 169 | 146 | 162 | 202 | 211 | 88  | 188 | 181 | 178 | t18A |
| PG3-8       | Soil      | UK          | 2015  | wt                            | 171 | 143 | 156 | 214 | 160 | 94  | 180 | 185 | 226 | t02  |
| SS8-7A*     | Soil      | Belgium     | 2015  | TR <sub>34</sub> /L98H        | 182 | 146 | 171 | 343 | 169 | 97  | 215 | 189 | 230 | t11  |
| G5-C5       | Soil      | Germany     | 2016  | wt                            | 188 | 141 | 171 | 436 | 169 | 115 | 215 | 181 | 186 | t13  |
| RN8-18*     | Soil      | UK          | 2016  | TR <sub>34</sub> /L98H        | 192 | 152 | 164 | 364 | 160 | 91  | 180 | 185 | 190 | t04B |
| PG3-4       | Soil      | UK          | 2015  |                               | 196 | 139 | 169 | 130 | 166 | 156 | 253 | 185 | 178 |      |
| F5-C6*      | Soil      | France      | 2016  | F46Y/M172V/E427K              | 163 | 132 | 160 | 160 | 172 | 106 | 176 | 165 | 166 | t15  |
| BB1-3-B9*   | Soil      | UK          | 2015  | F46Y/M172V/E427K              | 163 | 133 | 160 | 160 | 172 | 88  | 176 | 165 | 170 | t02* |
| G1-A9*      | Soil      | Germany     | 2016  | F46Y/M172V/E427K              | 163 | 134 | 160 | 160 | 172 | 88  | 176 | 165 | 170 | t02* |
| SS5-7C*     | Soil      | Austria     | 2015  | F46Y/M172V/E427K              | 163 | 135 | 160 | 160 | 172 | 124 | 176 | 165 | 170 | t08  |
| BB6-8-A9    | Soil      | UK          | 2015  | F46Y/M172V/E427K              | 163 | 135 | 162 | 160 | 172 | 106 | 176 | 165 | 170 | t08  |
| BB6-8-C7*   | Soil      | UK          | 2015  | F46Y/M172V/E427K              | 163 | 133 | 160 | 166 | 169 | 100 | 176 | 165 | 170 | t19  |
| UK2-B4*     | Soil      | UK          | 2016  | F46Y/M172V/E427K              | 163 | 133 | 160 | 187 | 166 | 88  | 176 | 165 | 166 | t08  |
| RS3-3*      | Soil      | UK          | 2016  | TR46/Y121F/T289A              | 163 | 143 | 156 | 235 | 160 | 94  | 196 | 185 | 226 | t02  |
| WN19-3*     | Soil      | UK          | 2016  | TR46/Y121F/T289A              | 163 | 141 | 164 | 244 | 160 | 216 | 180 | 185 | 186 | t01  |
| SS10-10A    | Soil      | Netherlands | 2015  | wt                            | 169 | 148 | 158 | 136 | 163 | 85  | 180 | 181 | 222 | t02  |
| G2-C1       | Soil      | Germany     | 2016  | wt                            | 169 | 143 | 160 | 136 | 163 | 94  | 180 | 181 | 226 | t05  |
| BB1-3-C8    | Soil      | UK          | 2015  | wt                            | 169 | 123 | 158 | 178 | 166 | 85  | 180 | 181 | 234 | t11  |
| BB1-2.2-B1* | Soil      | UK          | 2015  | wt                            | 169 | 147 | 162 | 202 | 211 | 88  | 188 | 181 | 178 | t18A |
| BB1-2.2-A10 | Soil      | UK          | 2015  | wt                            | 169 | 148 | 162 | 202 | 211 | 88  | 188 | 181 | 178 | t18A |
| UK5-B5*     | Soil      | UK          | 2016  | TR <sub>34</sub> /L98H        | 171 | 143 | 156 | 202 | 160 | 94  | 180 | 185 | 190 | t02  |
| UK5-C4      | Soil      | UK          | 2016  | wt                            | 171 | 143 | 162 | 217 | 160 | 85  | 180 | 185 | 194 | t02  |
| PG2-6       | Soil      | UK          | 2015  | D262Y                         | 173 | 143 | 158 | 136 | 163 | 82  | 180 | 185 | 186 | t05  |
| SS7-2A      | Soil      | Germany     | 2015  | L27I                          | 173 | 141 | 166 | 150 | 163 | 124 | 180 | 185 | 166 | t03  |
| SS5-2A*     | Soil      | Austria     | 2015  | D262Y                         | 179 | 127 | 158 | 136 | 163 | 100 | 180 | 185 | 174 | t05  |

|           |             |             |      |                               |     |     |     |     |     |     |     |     |     |      |
|-----------|-------------|-------------|------|-------------------------------|-----|-----|-----|-----|-----|-----|-----|-----|-----|------|
| PG1-5     | Soil        | UK          | 2015 | wt                            | 179 | 127 | 171 | 187 | 163 | 127 | 180 | 177 | 166 | t03  |
| PG2-10*   | Soil        | UK          | 2015 | wt                            | 179 | 127 | 156 | 190 | 163 | 118 | 184 | 181 | 166 | t04B |
| BB6-8-C10 | Soil        | UK          | 2015 | wt                            | 179 | 127 | 156 | 193 | 163 | 127 | 184 | 181 | 166 |      |
| PG3-9     | Soil        | UK          | 2015 | wt                            | 179 | 127 | 156 | 196 | 163 | 136 | 184 | 181 | 178 | t04A |
| SS10-6A*  | Soil        | Netherlands | 2015 | TR <sub>34</sub> /L98H        | 182 | 146 | 171 | 157 | 169 | 85  | 216 | 241 | 282 | t11  |
| BB6-8-B1* | Soil        | UK          | 2015 | D262Y                         | 182 | 141 | 156 | 217 | 175 | 130 | 184 | 181 | 166 | t03  |
| WN28-6*   | Soil        | UK          | 2016 | TR <sub>46</sub> /Y121F/T289A | 182 | 143 | 168 | 256 | 160 | 175 | 180 | 181 | 182 | t01  |
| F3-C6     | Soil        | France      | 2016 | wt                            | 184 | 148 | 175 | 187 | 163 | 109 | 184 | 197 | 178 | t03  |
| SSB8-9A   | Soil        | Belgium     | 2015 | wt                            | 184 | 123 | 162 | 217 | 200 | 94  | 216 | 241 | 166 | t05  |
| G2-B8     | Soil        | Germany     | 2016 | wt                            | 188 | 150 | 179 | 217 | 192 | 140 | 207 | 185 | 178 | t10  |
| BB1-8-A2  | Soil        | UK          | 2015 | wt                            | 188 | 143 | 169 | 220 | 166 | 85  | 219 | 249 | 166 | t04A |
| BB1-8-A5  | Soil        | UK          | 2015 | wt                            | 192 | 143 | 158 | 136 | 163 | 94  | 180 | 185 | 186 | t05  |
| PG3-6     | Soil        | UK          | 2015 | wt                            | 192 | 143 | 156 | 208 | 160 | 88  | 180 | 185 | 230 | t06A |
| F1-B1     | Soil        | France      | 2016 | wt                            | 192 | 141 | 171 | 134 | 169 | 184 | 176 | 181 | 186 | t13  |
| BB1-8-A7  | Soil        | UK          | 2015 | wt                            | 194 | 148 | 177 | 190 | 160 | 136 | 188 | 181 | 166 | t01  |
| PG3-3*    | Soil        | UK          | 2015 | wt                            | 196 | 139 | 169 | 130 | 166 | 159 | 253 | 185 | 178 | t01  |
| T8-2      | Tulip bulbs | UK          | 2015 | wt                            | 169 | 127 | 185 | 160 | 172 | 139 | 188 | 185 | 166 | t11  |
| T2-4      | Tulip bulbs | Netherlands | 2015 | wt                            | 179 | 141 | 162 | 153 | 163 | 175 | 180 | 181 | 166 | t03  |
| T4-1      | Tulip bulbs | Netherlands | 2015 | F46Y/M172V/E427K              | 163 | 137 | 160 | 160 | 166 | 104 | 176 | 165 | 170 | t08  |
| T6-1      | Tulip bulbs | UK          | 2015 | F46Y/M172V/E427K              | 163 | 133 | 160 | 184 | 166 | 127 | 176 | 165 | 166 | t13  |
| T1-3      | Tulip bulbs | Netherlands | 2015 | wt                            | 169 | 143 | 160 | 133 | 163 | 94  | 180 | 181 | 226 | t05  |
| T11-8     | Tulip bulbs | Netherlands | 2017 | TR <sub>34</sub> /L98H        | 171 | 143 | 158 | 202 | 160 | 94  | 180 | 185 | 258 | t02  |
| T11-B2    | Tulip bulbs | Netherlands | 2017 | TR <sub>34</sub> /L98H        | 171 | 143 | 158 | 202 | 160 | 94  | 180 | 185 | 262 | t02  |
| T6-5      | Tulip bulbs | UK          | 2015 | wt                            | 171 | 143 | 164 | 238 | 160 | 85  | 180 | 193 | 308 | t02  |
| T5-8      | Tulip bulbs | Netherlands | 2015 |                               | 177 | 127 | 162 | 150 | 163 | 130 | 180 | 177 | 166 |      |
| T3-3      | Tulip bulbs | Netherlands | 2015 | TR <sub>34</sub> /L98H        | 182 | 146 | 171 | 343 | 169 | 97  | 215 | 189 | 230 | t11  |
| T3-6      | Tulip bulbs | Netherlands | 2015 | TR <sub>34</sub> /L98H        | 182 | 146 | 171 | 343 | 169 | 97  | 215 | 189 | 230 | t11  |
| T5-3      | Tulip bulbs | Netherlands | 2015 | TR <sub>34</sub> /L98H        | 182 | 146 | 171 | 343 | 169 | 97  | 215 | 189 | 230 | t11  |
| T10-5     | Tulip bulbs | UK          | 2015 | TR <sub>34</sub> /L98H        | 182 | 146 | 171 | 343 | 169 | 97  | 215 | 189 | 230 | t11  |
| T2-8      | Tulip bulbs | Netherlands | 2015 | TR <sub>34</sub> /L98H        | 182 | 146 | 171 | 343 | 169 | 97  | 215 | 189 | 230 | t11  |

|            |                  |             |      |                                          |     |     |     |     |     |     |     |     |     |      |
|------------|------------------|-------------|------|------------------------------------------|-----|-----|-----|-----|-----|-----|-----|-----|-----|------|
| T1-2       | Tulip bulbs      | Netherlands | 2015 | TR <sub>34</sub> /L98H                   | 182 | 146 | 171 | 343 | 169 | 97  | 215 | 189 | 230 | t11  |
| T6-3       | Tulip bulbs      | UK          | 2015 | TR <sub>34</sub> /L98H                   | 182 | 146 | 171 | 343 | 169 | 97  | 215 | 189 | 230 | t11  |
| T4-7       | Tulip bulbs      | Netherlands | 2015 | TR <sub>34</sub> /L98H                   | 182 | 146 | 171 | 343 | 169 | 97  | 215 | 189 | 230 | t11  |
| T2-1       | Tulip bulbs      | Netherlands | 2015 | TR <sub>34</sub> /L98H                   | 182 | 148 | 171 | 343 | 169 | 97  | 215 | 189 | 230 | t11  |
| T10-6      | Tulip bulbs      | UK          | 2015 |                                          | 188 | 143 | 169 | 220 | 166 | 85  | 219 | 249 | 166 |      |
| T9-2       | Tulip bulbs      | UK          | 2015 | wt                                       | 188 | 141 | 177 | 550 | 160 | 118 | 168 | 189 | 186 | t01  |
| T1-4       | Tulip bulbs      | Netherlands | 2015 | wt                                       | 190 | 123 | 156 | 172 | 160 | 85  | 208 | 181 | 202 | t06B |
| T5-6       | Tulip bulbs      | Netherlands | 2015 | wt                                       | 192 | 143 | 164 | 208 | 160 | 85  | 180 | 185 | 234 | t02  |
| T4-10      | Tulip bulbs      | Netherlands | 2015 | TR <sub>46</sub> /Y121F/T289A            | 194 | 146 | 164 | 187 | 160 | 124 | 203 | 181 | 182 | t01  |
| T5-1       | Tulip bulbs      | Netherlands | 2015 | TR <sub>46</sub> /Y121F/T289A            | 194 | 146 | 164 | 187 | 160 | 124 | 203 | 181 | 182 | t01  |
| T5-2       | Tulip bulbs      | Netherlands | 2015 | TR <sub>46</sub> /Y121F/T289A            | 194 | 146 | 164 | 187 | 160 | 124 | 203 | 181 | 182 | t01  |
| T3-5       | Tulip bulbs      | Netherlands | 2015 | TR <sub>46</sub> /Y121F/T289A            | 194 | 146 | 164 | 187 | 160 | 124 | 203 | 181 | 182 | t01  |
| T7-9       | Tulip bulbs      | UK          | 2015 | TR <sub>46</sub> /Y121F/T289A            | 194 | 146 | 164 | 187 | 160 | 124 | 203 | 181 | 182 | t01  |
| T5-5       | Tulip bulbs      | Netherlands | 2015 | TR <sub>46</sub> /Y121F/T289A            | 194 | 146 | 164 | 187 | 160 | 124 | 203 | 181 | 182 | t01  |
| T4-9       | Tulip bulbs      | Netherlands | 2015 | TR <sub>46</sub> /Y121F/T289A            | 194 | 146 | 164 | 187 | 160 | 124 | 203 | 181 | 182 | t01  |
| TP UT4A-1  | Tulip peel waste | Netherlands | 2018 | TR <sub>46</sub> /Y121F/T289A            | 194 | 146 | 164 | 187 | 160 | 124 | 203 | 181 | 182 | t01  |
| TP UT4B-2  | Tulip peel waste | Netherlands | 2018 | TR <sub>46</sub> /Y121F/T289A            | 194 | 146 | 164 | 187 | 160 | 124 | 203 | 181 | 182 | t01  |
| TP UT5C-5  | Tulip peel waste | Netherlands | 2018 | TR <sub>34</sub> /L98H                   | 171 | 146 | 156 | 202 | 160 | 82  | 180 | 185 | 226 | t02  |
| TP UT1C-1  | Tulip peel waste | Netherlands | 2018 | wt                                       | 182 | 152 | 162 | 226 | 172 | 159 | 224 | 181 | 166 | t03  |
| TP UT1B-1  | Tulip peel waste | Netherlands | 2018 | TR <sub>34</sub> /L98H                   | 182 | 143 | 164 | 324 | 160 | 94  | 180 | 185 | 166 | t11  |
| TP UT4B-1  | Tulip peel waste | Netherlands | 2018 | TR <sub>34</sub> /L98H                   | 182 | 143 | 164 | 324 | 160 | 94  | 180 | 185 | 166 | t11  |
| TP TEB5C-2 | Tulip peel waste | Netherlands | 2018 | TR <sub>34</sub> /L98H/T289A/I364V/G448S | 188 | 123 | 164 | 136 | 166 | 82  | 196 | 185 | 226 | t02  |
| TP UT5C-7  | Tulip peel waste | Netherlands | 2018 | TR <sub>34</sub> /L98H                   | 188 | 123 | 158 | 223 | 163 | 79  | 180 | 193 | 226 | t02  |
| TP UT1A-7  | Tulip peel waste | Netherlands | 2018 | wt                                       | 188 | 141 | 169 | 262 | 166 | 85  | 200 | 181 | 166 | t01  |
| TP UT1A-2  | Tulip peel waste | Netherlands | 2018 | TR <sub>34</sub> /L98H                   | 192 | 146 | 171 | 157 | 169 | 91  | 180 | 241 | 190 | t02  |
| TP TEB5C-3 | Tulip peel waste | Netherlands | 2018 | TR <sub>46</sub> /Y121F/T289A            | 192 | 143 | 158 | 244 | 160 | 97  | 180 | 185 | 182 | t02  |
| TP UT5B-9  | Tulip peel waste | Netherlands | 2018 | TR <sub>46</sub> /Y121F/T289A??          | 194 | 123 | 164 | 202 | 160 | 82  | 180 | 201 | 182 | t02  |
| TP UT5B-3  | Tulip peel waste | Netherlands | 2018 | TR <sub>46</sub> /Y121F/T289A            | 163 | 143 | 156 | 238 | 160 | 94  | 196 | 185 | 226 | t02  |
| STNL4-B6   | Tulip soil       | Netherlands | 2016 |                                          | 163 | 133 | 160 | 184 | 166 | 127 | 176 | 165 | 166 |      |
| STNL6-B2   | Tulip soil       | Netherlands | 2016 | TR <sub>34</sub> /L98H                   | 182 | 123 | 156 | 253 | 163 | 94  | 180 | 173 | 190 |      |

|          |            |             |      |                                    |     |     |     |     |     |     |     |     |     |      |
|----------|------------|-------------|------|------------------------------------|-----|-----|-----|-----|-----|-----|-----|-----|-----|------|
| STNL5-B6 | Tulip soil | Netherlands | 2016 | TR <sub>34</sub> /L98H             | 188 | 146 | 164 | 355 | 160 | 85  | 188 | 181 | 230 | t11  |
| STNL5-C8 | Tulip soil | Netherlands | 2016 | TR <sub>46</sub> /Y121F/T289A      | 194 | 146 | 158 | 208 | 166 | 130 | 180 | 201 | 186 |      |
| STNL2-C9 | Tulip soil | Netherlands | 2016 | F46Y/M172V/E427K                   | 163 | 135 | 160 | 157 | 172 | 130 | 176 | 165 | 166 | t02* |
| STNL5-C5 | Tulip soil | Netherlands | 2016 | TR <sub>34</sub> /L98H/S297T/F495I | 171 | 123 | 158 | 202 | 160 | 82  | 180 | 201 | 226 | t02  |
| STNL6-B1 | Tulip soil | Netherlands | 2016 | TR <sub>34</sub> /L98H             | 171 | 146 | 156 | 205 | 160 | 94  | 180 | 185 | 226 | t01  |
| STNL1-A8 | Tulip soil | Netherlands | 2016 | wt                                 | 177 | 139 | 181 | 208 | 178 | 85  | 176 | 209 | 178 | t04A |
| STNL2-B8 | Tulip soil | Netherlands | 2016 | TR <sub>34</sub> /L98H             | 182 | 146 | 164 | 202 | 160 | 97  | 180 | 181 | 222 | t04B |
| STNL6-A3 | Tulip soil | Netherlands | 2016 | TR <sub>34</sub> /L98H             | 188 | 148 | 166 | 302 | 160 | 88  | 180 | 181 | 190 | t01  |
| STNL5-B7 | Tulip soil | Netherlands | 2016 | TR <sub>46</sub> /Y121F/T289A      | 192 | 143 | 164 | 244 | 160 | 82  | 196 | 185 | 182 | t02  |
| STNL3-C8 | Tulip soil | Netherlands | 2016 | TR <sub>34</sub> /L98H             | 192 | 143 | 164 | 343 | 163 | 94  | 180 | 181 | 166 | t04B |
| STNL5-C1 | Tulip soil | Netherlands | 2016 | TR <sub>46</sub> /Y121F/T289A      | 194 | 135 | 160 | 208 | 160 | 104 | 180 | 201 | 186 | t06A |

<sup>1</sup> Isolates marked with asterisk have been characterised in previous study [17]
